# Supplementary material for: Facile and controllable fabrication of gold nanoparticles-immobilized hollow silica particles and their high catalytic activity
Source: Royal Society of Chemistry journal article supplement (doi:10.1039/c3ta12583a), 2013-01-01
Supplement: c3ta12583a.pdf [file c3ta12583a.pdf]

# Facile and Controllable Fabrication of Gold Nanoparticles-Immobilized Hollow Silica Particles and their High Catalytic Activity

Hao Gu<sup>a</sup>, Jianing Wang<sup>a</sup>, Yucheng Ji<sup>a</sup>, Zhaoqun Wang<sup>a\*</sup>, Wei Chen<sup>b</sup>, and Gi Xue<sup>b</sup>

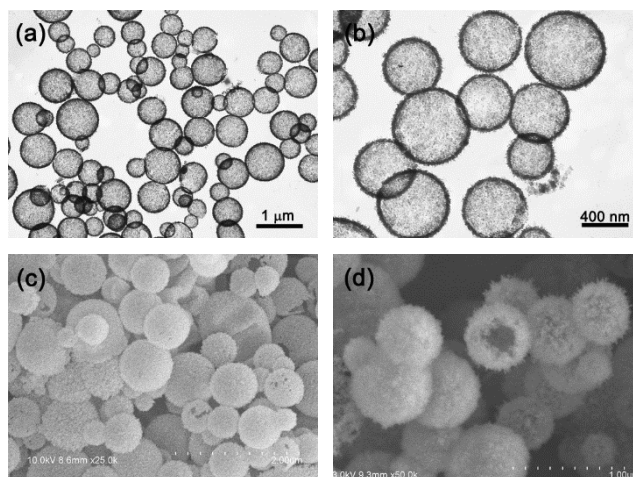

**Figure S1** TEM (a, b) and SEM (c, d) images of SiO<sub>2</sub>HPs prepared using TEOS as single precursor (i.e.,  $w_a=0$  wt%)

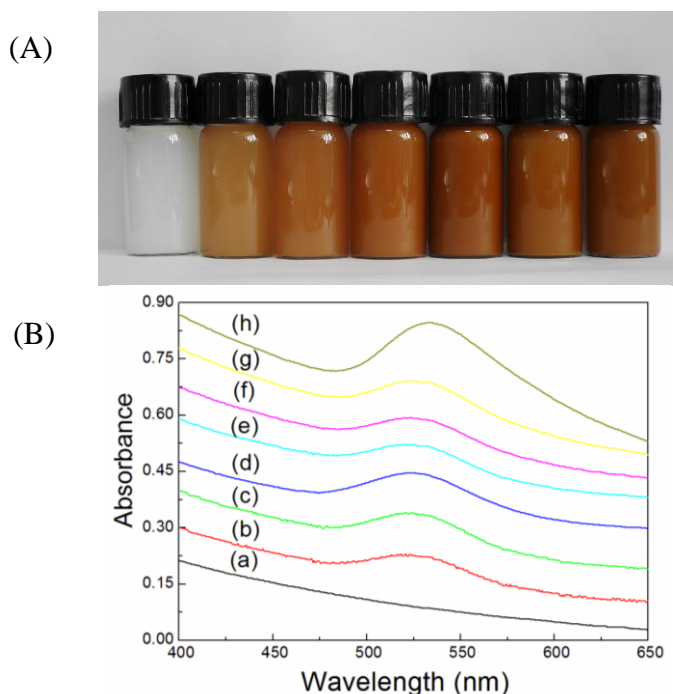

**Figure S2** (A) digital photos (left to right) and (B) UV-vis absorption spectra (a to h) of SiO<sub>2</sub>HP/AuNPs composite particles synthesized by in situ reduction of HAuCl<sub>4</sub> on the SiO<sub>2</sub>HPs prepared using  $w_a$  of 0, 5, 10, 20, 30, 40, and 50 wt% respectively

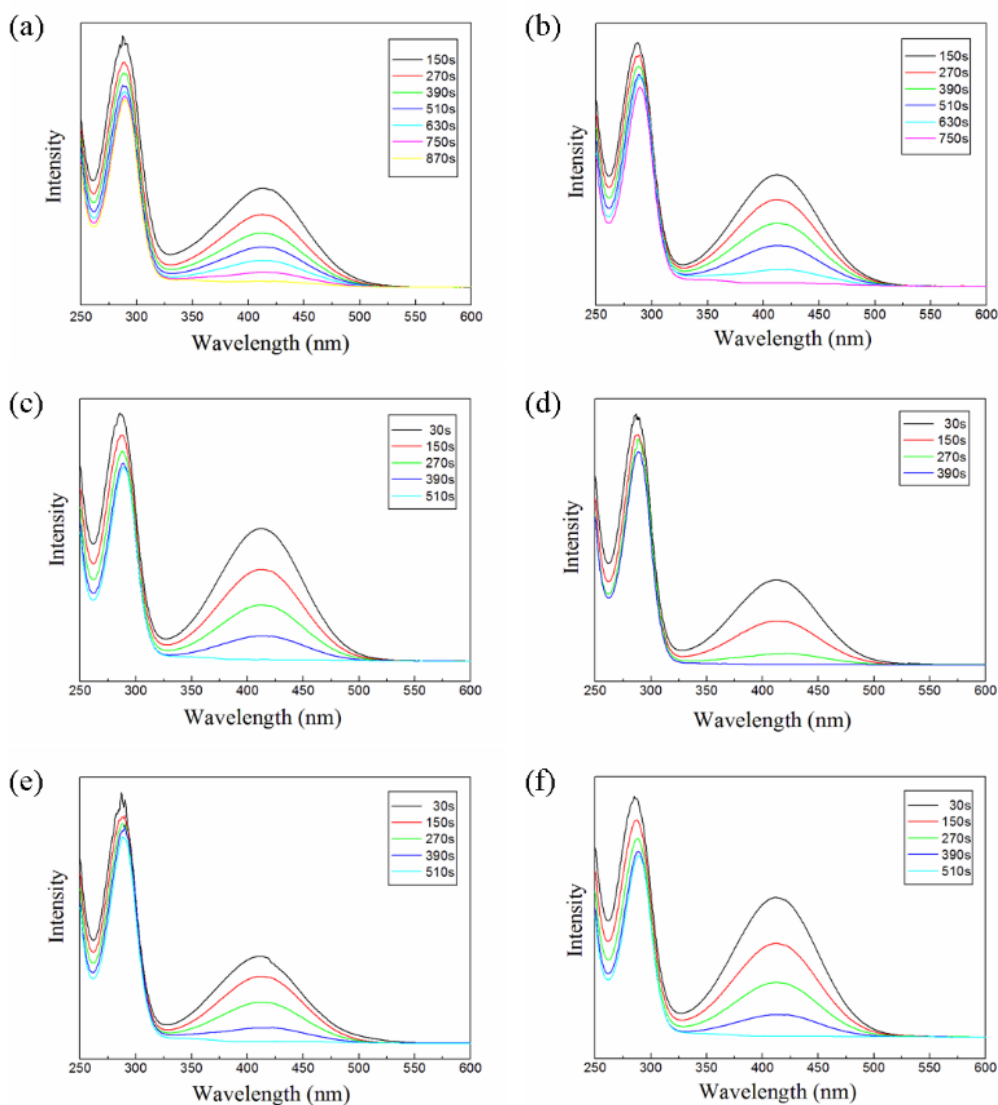

**Figure S3** Time-dependent UV-vis absorption spectral changes of the reaction mixture of 2NA/NaBH<sub>4</sub> 5 catalyzed by SiO<sub>2</sub>HP/AuNPs composite particles (SiO<sub>2</sub>HP sprepared using w<sub>a</sub> of 5 (a), 10 (b), 20 (c), 30 (d), 40 (e) and 50 wt% (f), respectively)

**Table S1** Catalytic activity of SiO<sub>2</sub>HP/AuNPs with different w<sub>a</sub>

| w <sub>a</sub> of SiO <sub>2</sub> HP/AuNPs (wt%) | k <sub>app</sub> (s <sup>-1</sup> ×10 <sup>-3</sup> ) |
|---------------------------------------------------|-------------------------------------------------------|
| 5                                                 | 3.91                                                  |
| 10                                                | 5.39                                                  |
| 20                                                | 7.50                                                  |
| 30                                                | 11.28                                                 |
| 40                                                | 8.66                                                  |
| 50                                                | 7.60                                                  |

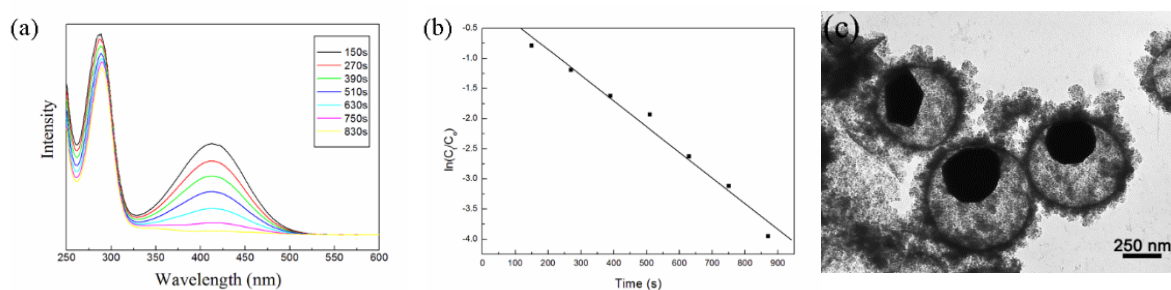

**Figure S4** Time-dependent UV-vis absorption spectral changes (a) and plot (■) of  $\ln(C_t/C_0)$  versus reaction time (b) of the reaction mixture of 2NA/NaBH<sub>4</sub> catalyzed by SiO<sub>2</sub>HP/AuNPs composite particles and TEM images (c) of the composite particles ( $w_a=50$  wt%)

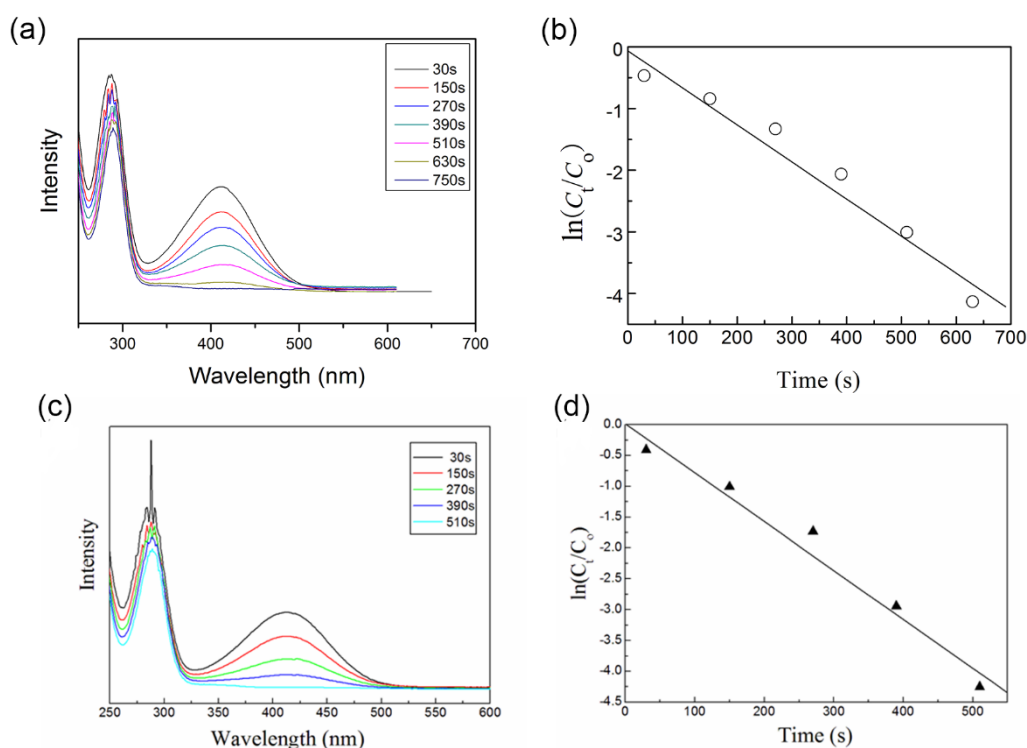

**Figure S5** Time-dependent UV-vis absorption spectral changes (a, c) and plot of  $\ln(C_t/C_0)$  versus reaction time (b, d) of the reaction mixture of 2NA/NaBH<sub>4</sub> after recycling the SiO<sub>2</sub>HP/AuNPs composite particles with  $w_a=20$  wt% (a, b) and  $w_a=30$  wt% (c, d) for five times

**Table S2** Catalytic activities compared with references

| No.* | Catalyst                           | Concentration<br>mg/mL | 2NA<br>mM | NaBH <sub>4</sub><br>mM | $K_{app}$<br>$10^{-3} s^{-1}$ |
|------|------------------------------------|------------------------|-----------|-------------------------|-------------------------------|
| 1    | Au@SiO <sub>2</sub>                | 0.500                  | 3.0       | 50                      | 1.69                          |
| 2    | AAMO/Au/mSiO <sub>2</sub>          | 0.133                  | 4.0       | 33                      | 1.27                          |
| 3    | Au–NH <sub>2</sub> –HMSNs          | 0.200                  | 2.4       | 12                      | 6.7                           |
| 4    | Au@HSNs                            | 0.118                  | 3.0       | 15                      | 2.45                          |
| p    | SiO <sub>2</sub> HP/AuNPs (30 wt%) | 0.133                  | 2.4       | 66.7                    | 11.3                          |

\* REF: [1] L. Tan, D. Chen, H. Liu and F. Tang, *Adv. Mater.* **2010**, 22, 4885; [2] L. Wang, J. Shi, Y. Zhu, Q. He, H. Xing, J. Zhou, F. Chen, Y. Chen, *Langmuir*. **2012**, 28, 4920; [3] X. Du, J. He, *Nanoscale*. **2012**, 4, 852; [4] X. Du, L. Yao, J. He, *Chem. Eur. J.* **2012**, 18, 7878; [p] Our result in this article
